# Supplementary material for: Integrated Fossil and Molecular Data Reveal the Biogeographic Diversification of the Eastern Asian-Eastern North American Disjunct Hickory Genus (Carya Nutt.)
Source: PLoS One. 2013 Jul 16;8(7):e70449. doi: 10.1371/journal.pone.0070449 (PMC3713062; doi:10.1371/journal.pone.0070449)
Supplement: Table S5 — (XLS) [file pone.0070449.s005.xls]

## Sheet: TableS4
Table S5-Extinct taxa with fruit fossils in other genera of the Juglandaceae.
Species names	Epochs	Locations	References
Cruciptera schaarschmidtii Manchester, Collinson & Goth	Eocene	B	Manchester et al., 1994
Cruciptera simsonii (Brown) Manchester	Middle Eocene	A	Manchester et al., 1994
Cyclocarya brownii Manchester & Dilcher	Paleocene	A	Manchester and Dilcher, 1982
Cyclocarya coalmontensis Manchester & Dilcher	Paleocene-Eocene	A	Manchester and Dilcher, 1982
Cyclocarya cycloptera (Schlechtendal) Iljinskaya	Oligocene-Pliocene	B, C	Iljinskaya, 1953
Cyclocarya minuta Manchester	Paleocene	A	Manchester, 1987
Cyclocarya tavdensis Dorofeev	Oligocene	C	Dorofeev, 1970
Cyclocarya tomskiana Dorofeev	Oligocene	B, C	Dorofeev, 1970
Cyclocarya tymensis Dorofeev	Oligocene	C	Dorofeev, 1970
Hooleya hermis (Unger) Reid & Chandler	Lower Oligocene	B	Reid and Chandler, 1926
Hooleya lata Wing & Hickey	Middle Eocene	A	Wing and Hickey, 1984
Juglans clarnensis Scott	Miocene	A	Scott, 1954
Juglans eocinerea Hills, Klovan & Sweet	Miocene	A	Hills et al., 1974
Juglans lacunosa Manchester	Oligocene	A	Manchester, 1987
Juglans megacinerwa Miki ex Chaney	Miocene-Pleistocene	C	Manchester, 1987
Juglans nevadensis Berry	Miocene	A	Manchester, 1987
Juglans siberica Dorofeev	Miocene	C	Dorofeev, 1972
Juglans siouxensis (Barbour) Berry	Lower Oligocene	A	Manchester, 1987
Juglans tephrodes Unger	Oligocene	B	Hills et al., 1974
Palaeocarya clarnensis Manchester	Eocene	A	Manchester, 1987
Palaeocarya koreanica (Oishi) Manchester	Oligocene-Miocene	C	Manchester, 1987
Palaeocarya macroptera (Brongniart) Jähnichen, Friederick & Takác	Eocene-Pliocene	B	Manchester, 1987
Palaeocarya mississippiensis (Berry) Manchester	Eocene	A	Manchester, 1987
Palaeocarya nevadensis (MacGinitie) Manchester	Eocene	A	Manchester, 1987
Palaeocarya olsoni (Brown) Manchester	Miocene	A	Manchester, 1987
Palaeocarya puryearensis (Berry) Manchester	Eocene	A	Manchester, 1987
Palaeocarya uintaensis (MacGinitie) Manchester	Eocene	A	Manchester, 1987
Palaeocarya willamettensis Manchester	Oligocene	A	Manchester, 1987
Palaeocarya wolfei Manchester	Late Eocene	A	Manchester, 1987
Paleooreomunnea Dilcher, Potter & Crepet	Middle Eocene	A	Manchester, 1987
Paleooreomunnea stoneanaDilcher, Potter & Crepet	Middle Eocene	A	Dilcher et al., 1976
Paleoplatycarya wingii Manchester	Early Eocene	A	Wing and Hickey, 1984
Paraengelhardia Berry	Middle Eocene	A	Manchester, 1987
Paraengelhardia eocenica Berry	Middle Eocene	A	Manchester, 1987
Platycarya americana Hickey	Early Eocene	A	Hickey and Doyle, 1977
Platycarya richardsoni Reid & Chandler	Early Eocene	B	Chandler, 1964
Polyptera manningii Manchester & Dilcher	Paleocene	A	Manchester and Dilcher, 1997
Polyptera sp. Manchester & Dilcher	Paleocene	A	Manchester and Dilcher, 1982
Pterocarya asymmetrosa Kono	Neogene	C	Manchester, 1987
Pterocarya castaneaefolia (Goepp.) Schlechtendal	Oligocene-Neogene	B, C	Manchester, 1987
Pterocarya crassa Dorofeev	Miocene	C	Manchester, 1987
Pterocarya eomacroptera Manchester	Miocene	A	Manchester, 1987
Pterocarya kireeevskiana Dorofeev	Miocene	C	Manchester, 1987
Pterocarya limburgensis Reid	Pliocene	B	Manchester, 1987
Pterocarya macginitii Manchester & Dilcher	Middle Eocene	A	Manchester, 1987
Pterocarya occidentalis Manchester	Oligocene	A	Manchester, 1987
Pterocarya protostenoptera Tanai	Miocene	C	Manchester, 1987
Pterocarya raciborskii Zablocki	Miocene	B	Manchester, 1987
Pterocarya smileyi Manchester	Miocene	A	Manchester, 1987
Pterocaryopsis spp. Chandler	Early Eocene	B	Manchester, 1987
Notes: A, North America; B, Europe; C, Asia.
References
Chandler MEJ (1964) The Lower Tertiary floras of southern England IV. London: British Museum (Natural History).
Dilcher DL, Potter Jr FW, Crepet WL (1976) Investigations of angiosperms from the Eocene of North America: juglandaceous fruits. American Journal of Botany 63: 532-544.
Dorofeev PI (1970) A contribution to the taxonomy of certain fossil Juglandaceae. Botanicheskii Zhurnal 55: 1596-1604.
Dorofeev PL (1972) Istorija flory i rastitel'nosti Eurazii. Moscow: Nauka.
Hickey LJ, Doyle JA (1977) Early Cretaceous fossil evidence for angiosperm evolution. The Botanical Review 43: 3-104.
Hills L, Klovan J, Sweet AR (1974) Juglans eocinerea n. sp., Beaufort Formation (Tertiary), southwestern Banks Island, Arctic Canada. Canadian Journal of Botany 52: 65-90.
Iljinskaya IA (1953) Monography of the genus Pterocarya Kunth. Trudy Botanicheskogo Instituta Akademii Nauk SSSR 10: 7-123.
Manchester SR (1987) The fossil history of the Juglandaceae. Monographs in Systematic Botany from the Missouri Botanical Garden 21: 1-137.
Manchester SR, Collinson ME, Goth K (1994) Fruits of the Juglandaceae from the Eocene of Messel, Germany, and Implications for Early Tertiary Phytogeographic Exchange between Europe and Western North America. International Journal of Plant Sciences 155: 388-394.
Manchester SR, Dilcher DL (1982) Pterocaryoid fruits (Juglandaceae) in the Paleogene of North America and their evolutionary and biogeographic significance. American Journal of Botany 69: 275-286.
Manchester SR, Dilcher DL (1997) Reproductive and vegetative morphology of Polyptera (Juglandaceae) from the Paleocene of Wyoming and Montana. American Journal of Botany 84: 649-649.
Reid EM, Chandler MEJ (1926) The Bembridge flora: catalogue of Cainozoic plants in the department of geology, I. London: Brithish Museum (Natural History).
Scott RA (1954) Fossil fruits and seeds from the Eocene Clarno Formation of Oregon. Palaeontographica Abteilung B 96: 66-97.
Wing SL, Hickey LJ (1984) The Platycarya perplex and the evolution of the Juglandaceae. American Journal of Botany 71:388-411.
